# Supplementary material for: Combined supplementation with hesperidin, phytosterols and curcumin decreases adiposity and improves metabolic health in ovariectomized rats
Source: Royal Society of Chemistry journal article supplement (doi:10.1039/d3fo05122f), 2024-01-01
Supplement: d3fo05122f1.pdf [file d3fo05122f1.pdf]

**Supplementary table 1: Nucleotide sequences of primers used for real time quantitative PCR in sham-operated (SH) and ovariectomized (OVX) rats after 8 weeks of intervention**

| Gene          | Forward primer (5' to 3') | Reverse primer (5' to 3') |
|---------------|---------------------------|---------------------------|
| <i>Acc1</i>   | TGCAGGTATCCCCACTCTTC      | TTCTGATTCCTTCCCTCCT       |
| <i>Atgl</i>   | CACCTTAGCTCCAAGGATGA      | TGGTTCAGTAGGCCATTCTCT     |
| <i>Cd36</i>   | GTCCTGGCTGTGTTTGGGA       | GCTCAAAGATGGCTCCATTG      |
| <i>Cebpa</i>  | AGCCGAGATAAAGCCAAACA      | CCTTGACCAAGGAGCTCTCA      |
| <i>Cpt1b</i>  | GCAAACCTGGACCGAGAAGAG     | CCTTGAAGAAGCGACCTTTG      |
| <i>Emr1</i>   | GATGTGGAGGATGGGAGATG      | GCACGAAACAACAGGAAGGT      |
| <i>Fas</i>    | CGGCGAGTCTATGCCACTAT      | ACACAGGGACCGAGTAATGC      |
| <i>Had</i>    | ATCGTGAACCGTCTCTTGGT      | AGGACTGGGCTGAAATAAGG      |
| <i>Hprt</i>   | TCCCAGCGTCGTGATTAGTGA     | CCTTCATGACATCTCGAGCAAG    |
| <i>Hsl</i>    | TCACGCTACATAAAGGCTGCT     | CCACCCGTAAAGAGGGAACT      |
| <i>Insr</i>   | AACGACATTGCCCTGAAGAC      | CATCCTGCCCATCAAACCTCT     |
| <i>Irs1</i>   | CTACACCCGAGACGAACACT      | TAACTGCCAGACCTCCTTG       |
| <i>Lpl</i>    | TATGGCACAGTGGCTGAAAG      | CTGACCAGCGGAAGTAGGAG      |
| <i>Mgl1</i>   | CTCCAACACCAAGGCTGAAC      | GGTCTTCAAGTCCTTCCCA       |
| <i>Pparg2</i> | CTGGACCTCTGCTGGTGAT       | CCGTGGTAAAGGGTTTGATG      |
| <i>Ppia</i>   | CCAAACACAAATGGTTCCAGT     | ATTCCTGGACCCAAAACGCT      |

The table shows the nucleotide sequences of primers used for PCR amplification. Primer pairs for PCR were designed using Primer3 software and the sequence information were obtained from Genbank. *Acc1*: acetyl CoA carboxylase 1; *Atgl*: adipose triglyceride lipase; *Cd36*: fatty acid translocase: homologue of CD36; *Cebpa*: CCAAT/enhancer binding protein alpha; *Cpt1b*: carnitine palmitoyltransferase 1 beta; *Emr1*: EGF-like module containing, mucin-like, hormone receptor-like 1; *Fas*: fatty acid synthase; *Had*: hydroxyacyl-CoA dehydrogenase; *Hprt*: hypoxanthine guanine phosphoribosyl transferase; *Hsl*: hormone-sensitive lipase; *Insr*: insulin receptor; *Irs1*: insulin receptor substrate 1; *Lpl*: lipoprotein lipase; *Mgl1*: C-type lectin domain family 10, member A; *Pparg2*: peroxisome proliferator-activated receptor gamma 2; *Ppia*: peptidylprolyl isomerase A.
